# Supplementary material
Source: bioRxiv or medRxiv preprint supplement (https://www.biorxiv.org/content/biorxiv/early/2022/04/10/2022.04.08.487692/DC2/embed/media-2.pdf)

A

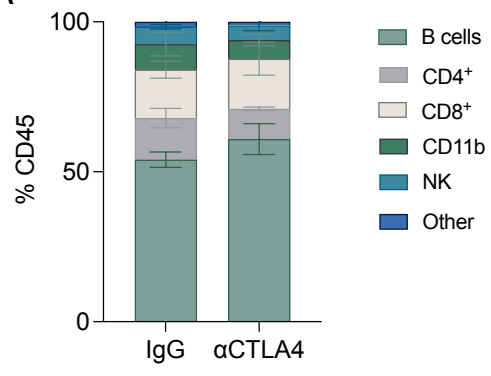

Supplement: Supplementary file [file media-2.pdf]
